# Supplementary material for: Urtica dioica L. inhibits proliferation and enhances cisplatin cytotoxicity in NSCLC cells via Endoplasmic Reticulum-stress mediated apoptosis
Source: PubMed Central journal article supplement (PMC6428841; doi:10.1038/s41598-019-41372-1), 2019-03-21
Supplement: 41598_2019_41372_MOESM1_ESM.pdf [file 41598_2019_41372_MOESM1_ESM.pdf]

***Urtica dioica* L. inhibits proliferation and enhances cisplatin cytotoxicity in NSCLC cells *via* Endoplasmic Reticulum-stress mediated apoptosis**

Brigida D'Abrosca\*<sup>1</sup>, Vincenza Ciaramella<sup>2§</sup>, Vittoria Graziani<sup>1§</sup>, Federica Papaccio<sup>2</sup>, Carminia Maria Della Corte<sup>2</sup>, Nicoletta Potenza<sup>1</sup>, Antonio Fiorentino<sup>1</sup>, Fortunato Ciardiello<sup>2</sup> and Floriana Morgillo<sup>2</sup>

<sup>1</sup>Dipartimento di Scienze e Tecnologie Ambientali Biologiche e Farmaceutiche –DiSTABiF, Università degli Studi della Campania “Luigi Vanvitelli”, via Vivaldi 43 I-81100, Caserta, Italy

<sup>2</sup>Dipartimento di Medicina di Precisione, Università degli Studi della Campania “Luigi Vanvitelli” 80131 Via Pansini, 5 - Napoli, Italy

<sup>§</sup>Vincenza Ciaramella and <sup>§</sup>Vittoria Graziani contributed equally to this work. Correspondence and requests for materials should be addressed to \*Brigida D'Abrosca ([brigida.dabrosca@unicampania.it](mailto:brigida.dabrosca@unicampania.it))

**Figure S1.** Western Blot analyses of the proteins involved in apoptosis of NSCLC (H1299 and A549) cell lines, normal bronchial epithelial (Beas2b) cells and human fibroblasts (Wi38)

**Figure S2.** The expression levels of ER-stress related proteins

**Figure S3.** CIGAR experiment of *Urtica dioica* crude extract. R= rutin. OXY=oxylipins

**Figure S4.** HSQC-TOCSY experiment of *Urtica dioica* crude extract

**Figure S5.** DQCOSY experiment of *Urtica dioica* crude extract. R= rutin. OXY=oxylipins

**Figure S6.** HMBC experiment of rutin

**Figure S7.**  $^1\text{H}$ -NMR spectrum of oxylipins' enriched fraction

**Figure S8.** H2BC experiment of oxylipins' enriched fraction

**Figure S9.** ESI Q-TOF MS spectrum of main oxylipin acquired in negative (A) and positive ion mode (B)

**Figure S10.** HSQC experiment of the main oxylipin

**Table S1.** NMR data of oxylipin recorded in  $\text{CD}_3\text{OD}$ .  $^1\text{H}$  and  $^{13}\text{C}$  are measured in ppm

**Figure S1.**

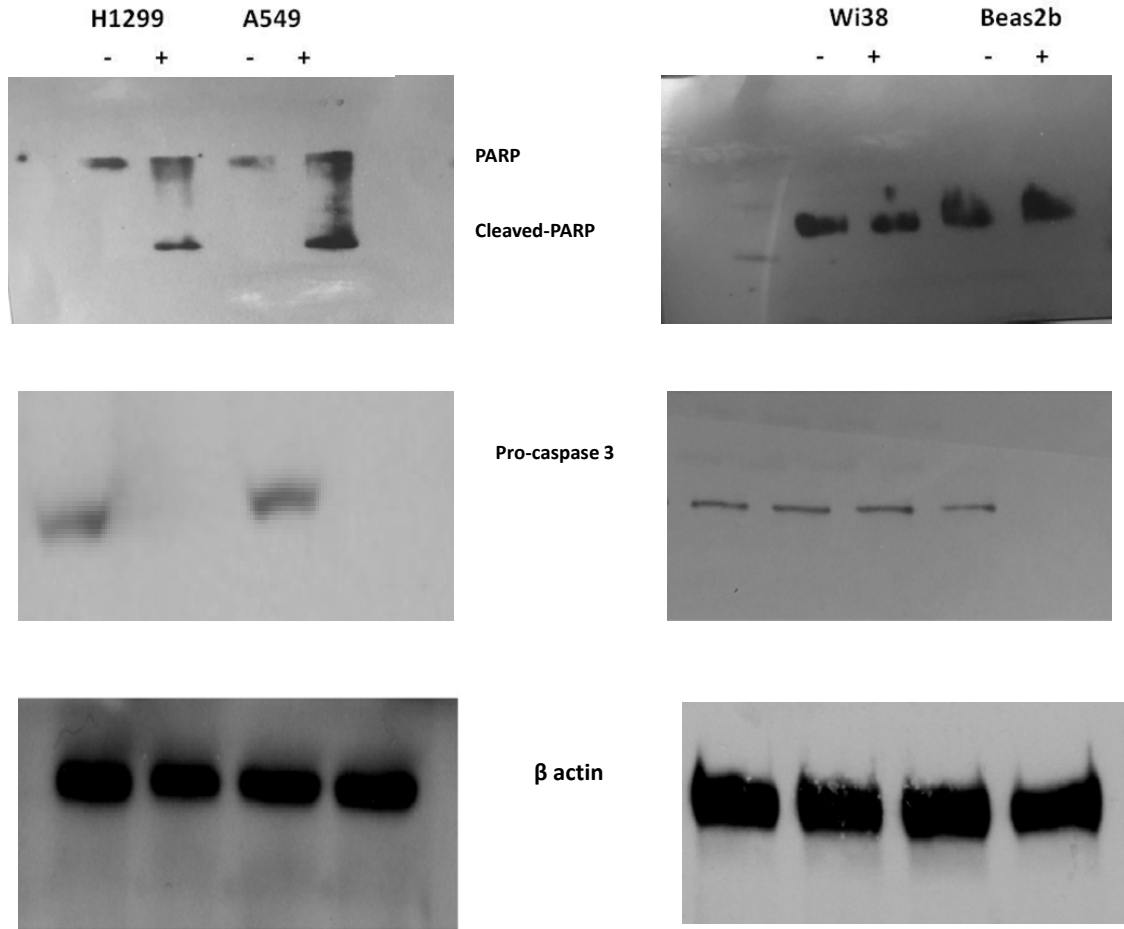

**Figure S1. Western Blot analyses of the proteins involved in apoptosis of NSCLC (H1299 and A549) cell lines, normal bronchial epithelial (Beas2b) cells and human fibroblasts (Wi38).** The Western Blot analyses for the indicated proteins were performed on the protein lysates from cells, which were incubated with (+) and without (-) *Urtica dioica* extract (60  $\mu\text{g}/\text{mL}$ ) for 72 h. The blots have been cut out according to the molecular weight of the proteins to allow multiple hybridizations with specific antibodies including anti-actin antibody that was used to normalise the obtained signals. After hybridization, the cropped images were acquired and the blots were re-hybridized where applicable.

**Figure S2.**

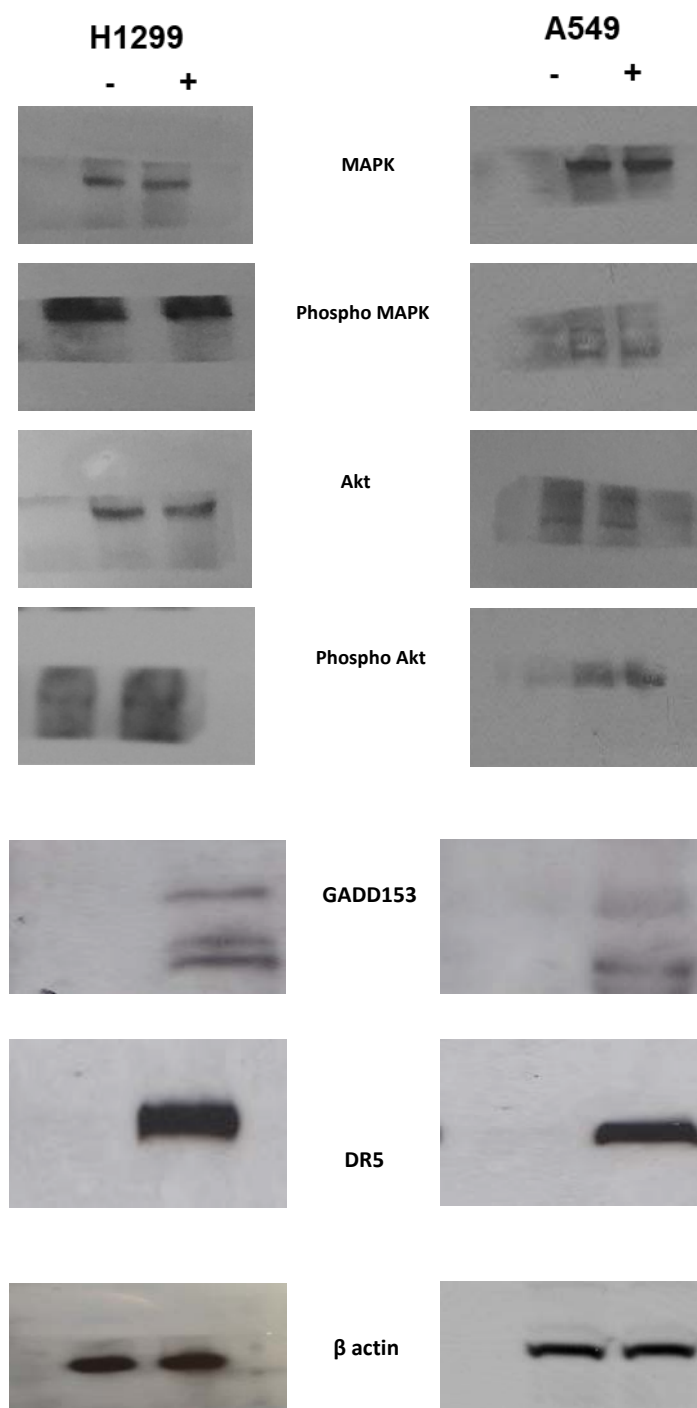

**Figure S2. The expression levels of ER-stress related proteins.** The expression levels of ER-stress related proteins were investigated on H1299 and A549 cancer cells following treatment with (+) and without (-) *Urtica dioica* extract (60  $\mu$ g/mL) for 72h. The blots have been cut out according to the molecular weight of the proteins to allow multiple hybridizations with specific antibodies, including anti-actin antibody that was used to normalize the obtained signals. After hybridization, the cropped images were acquired and the blots were re-hybridized where applicable.

**Figure S3A.** CIGAR experiment of *Urtica dioica* crude extract. R= rutin. OXY=oxylipins

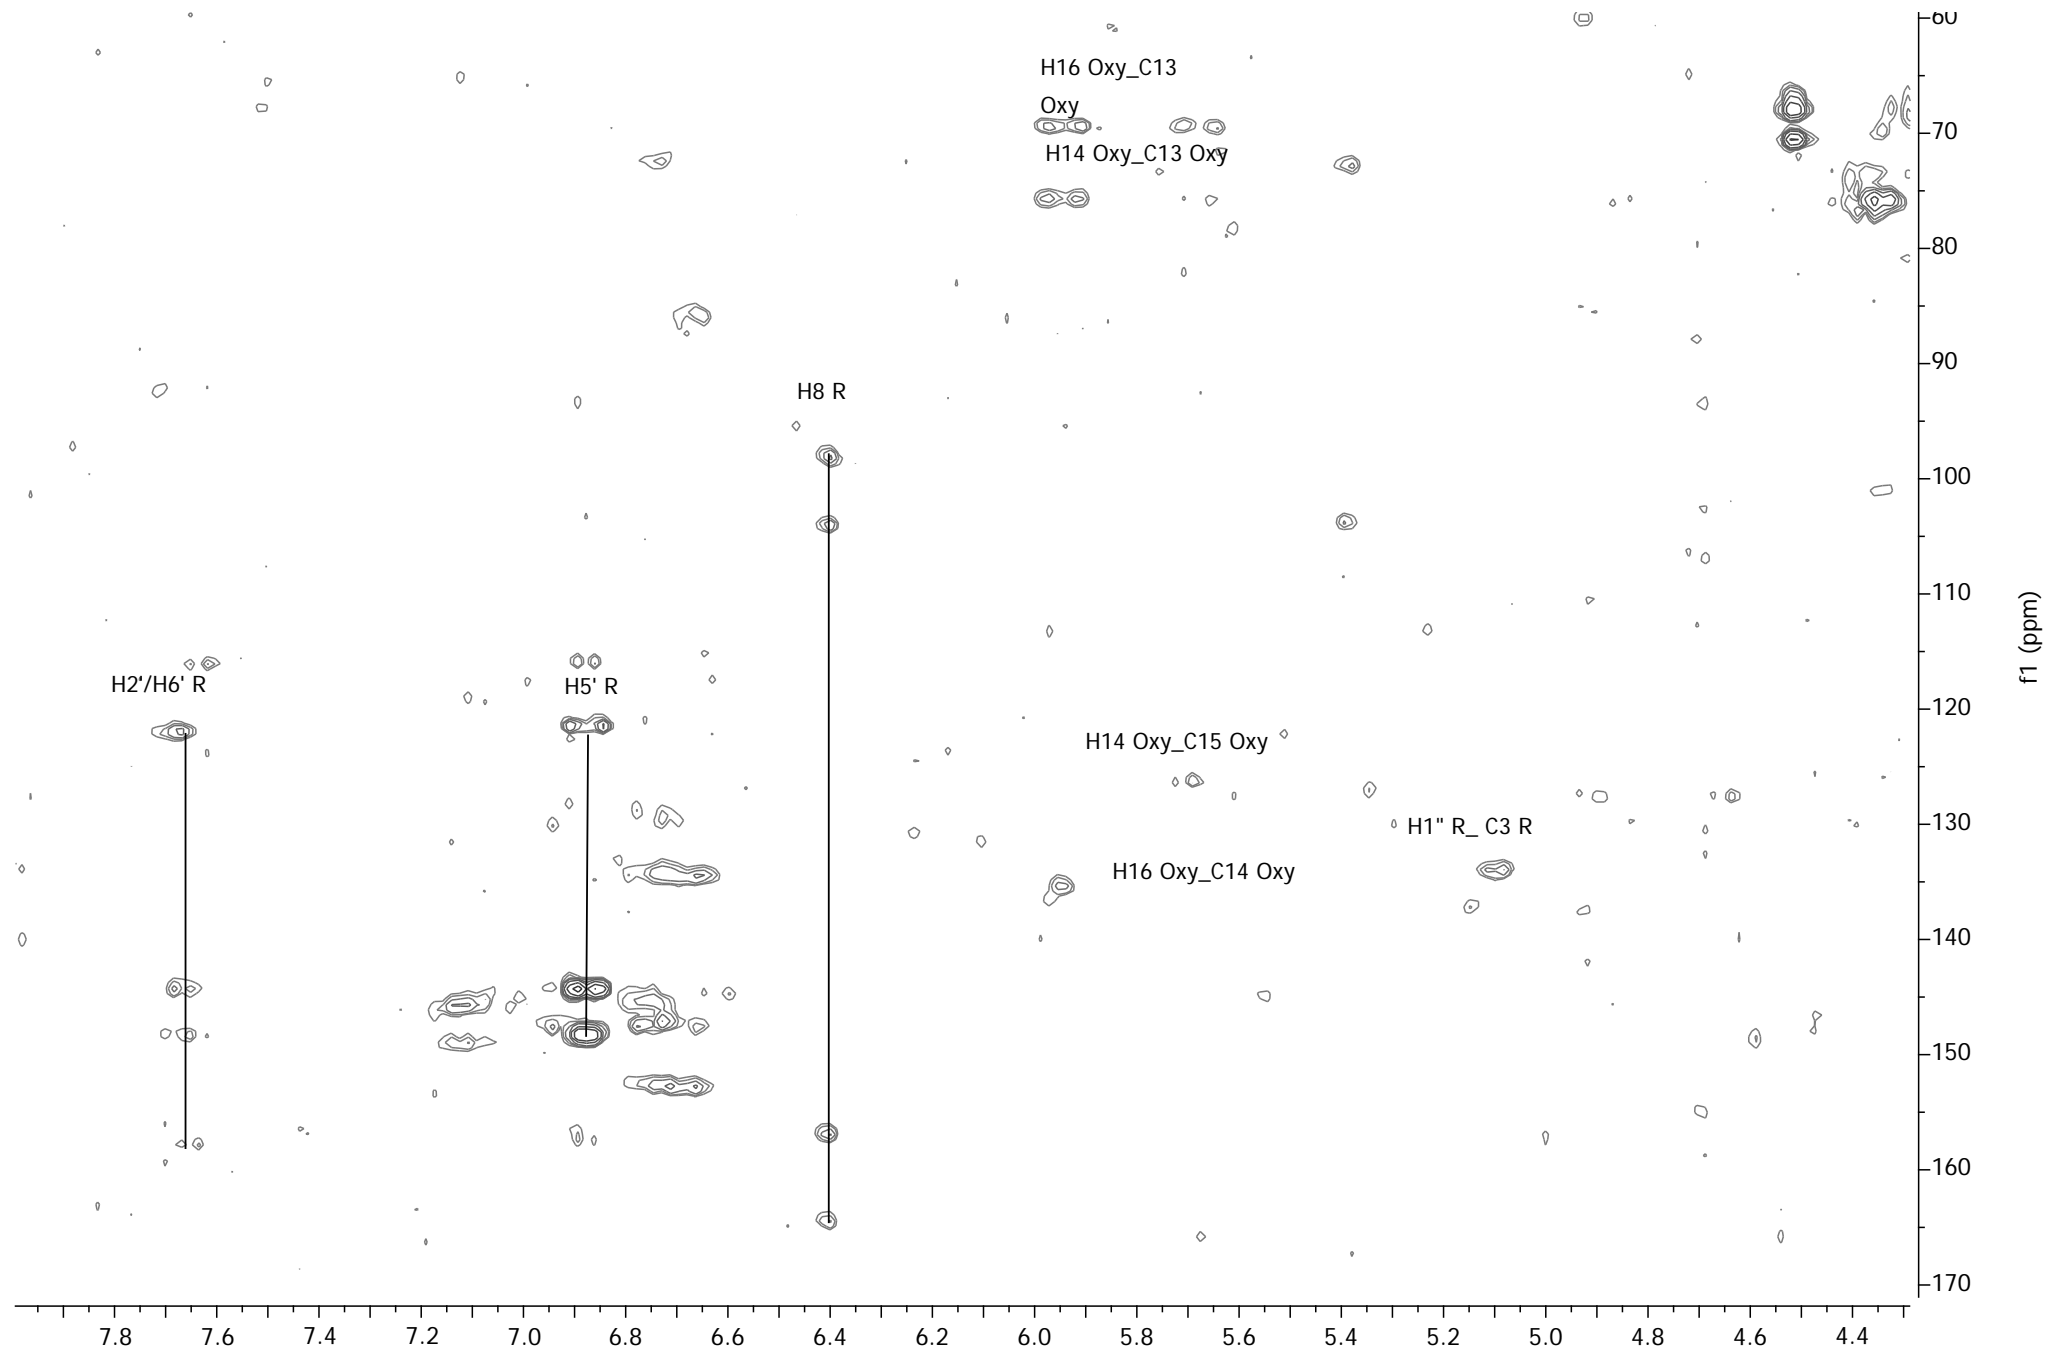

**Figure S3B.** Aliphatic region of CIGAR experiment of *Urtica dioica* crude extract, R= rutin. OXY=oxylipins

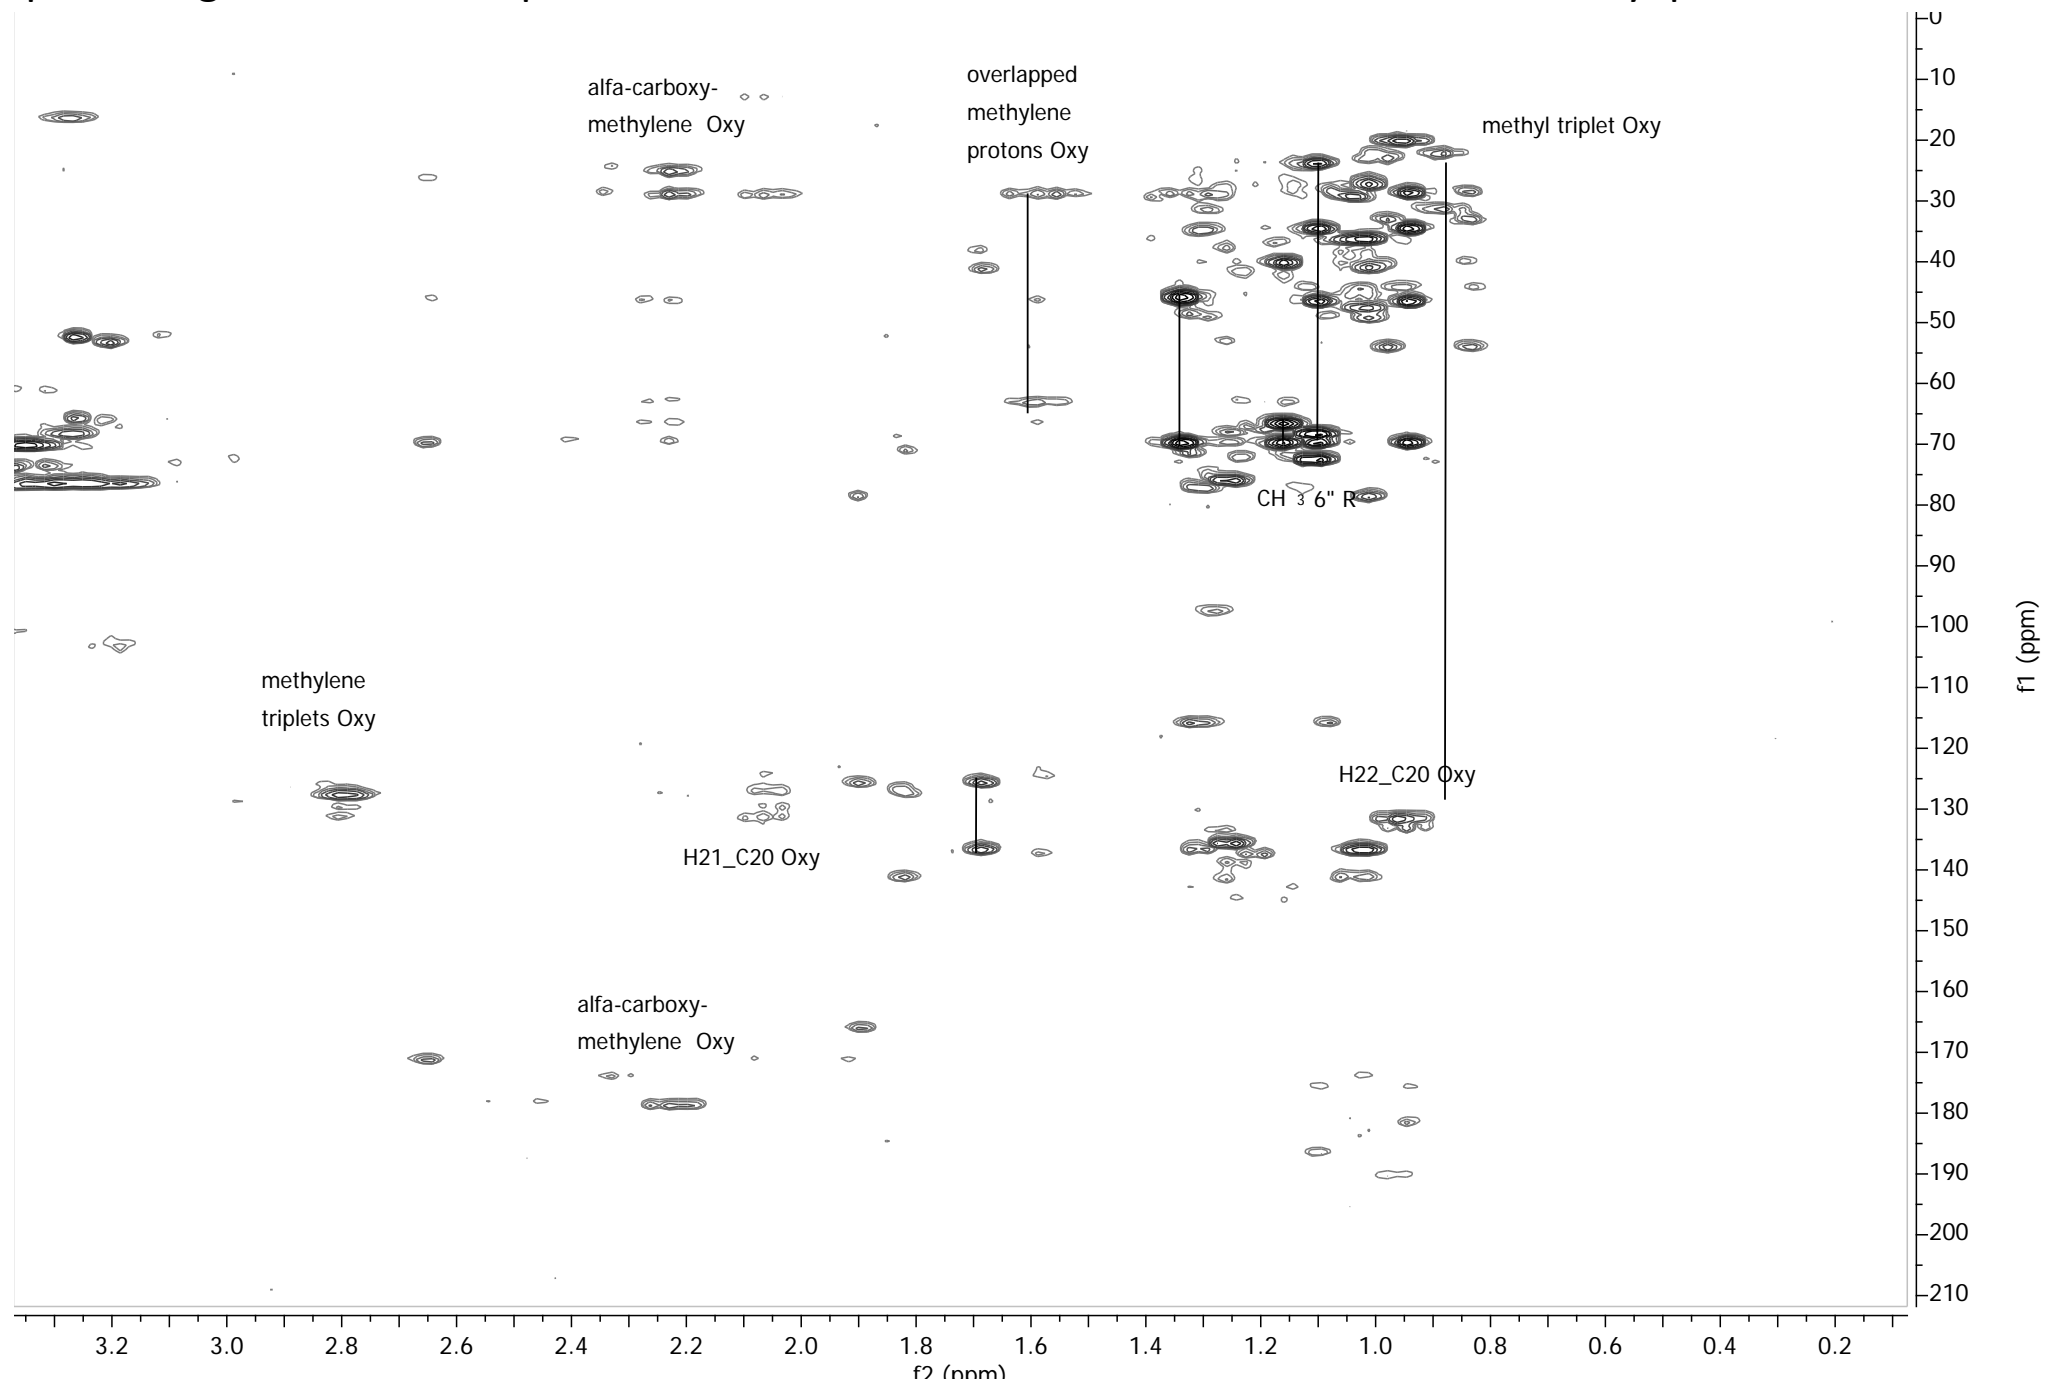

**Figure S4.** HSQC-TOCSY experiment of *Urtica dioica* crude extract

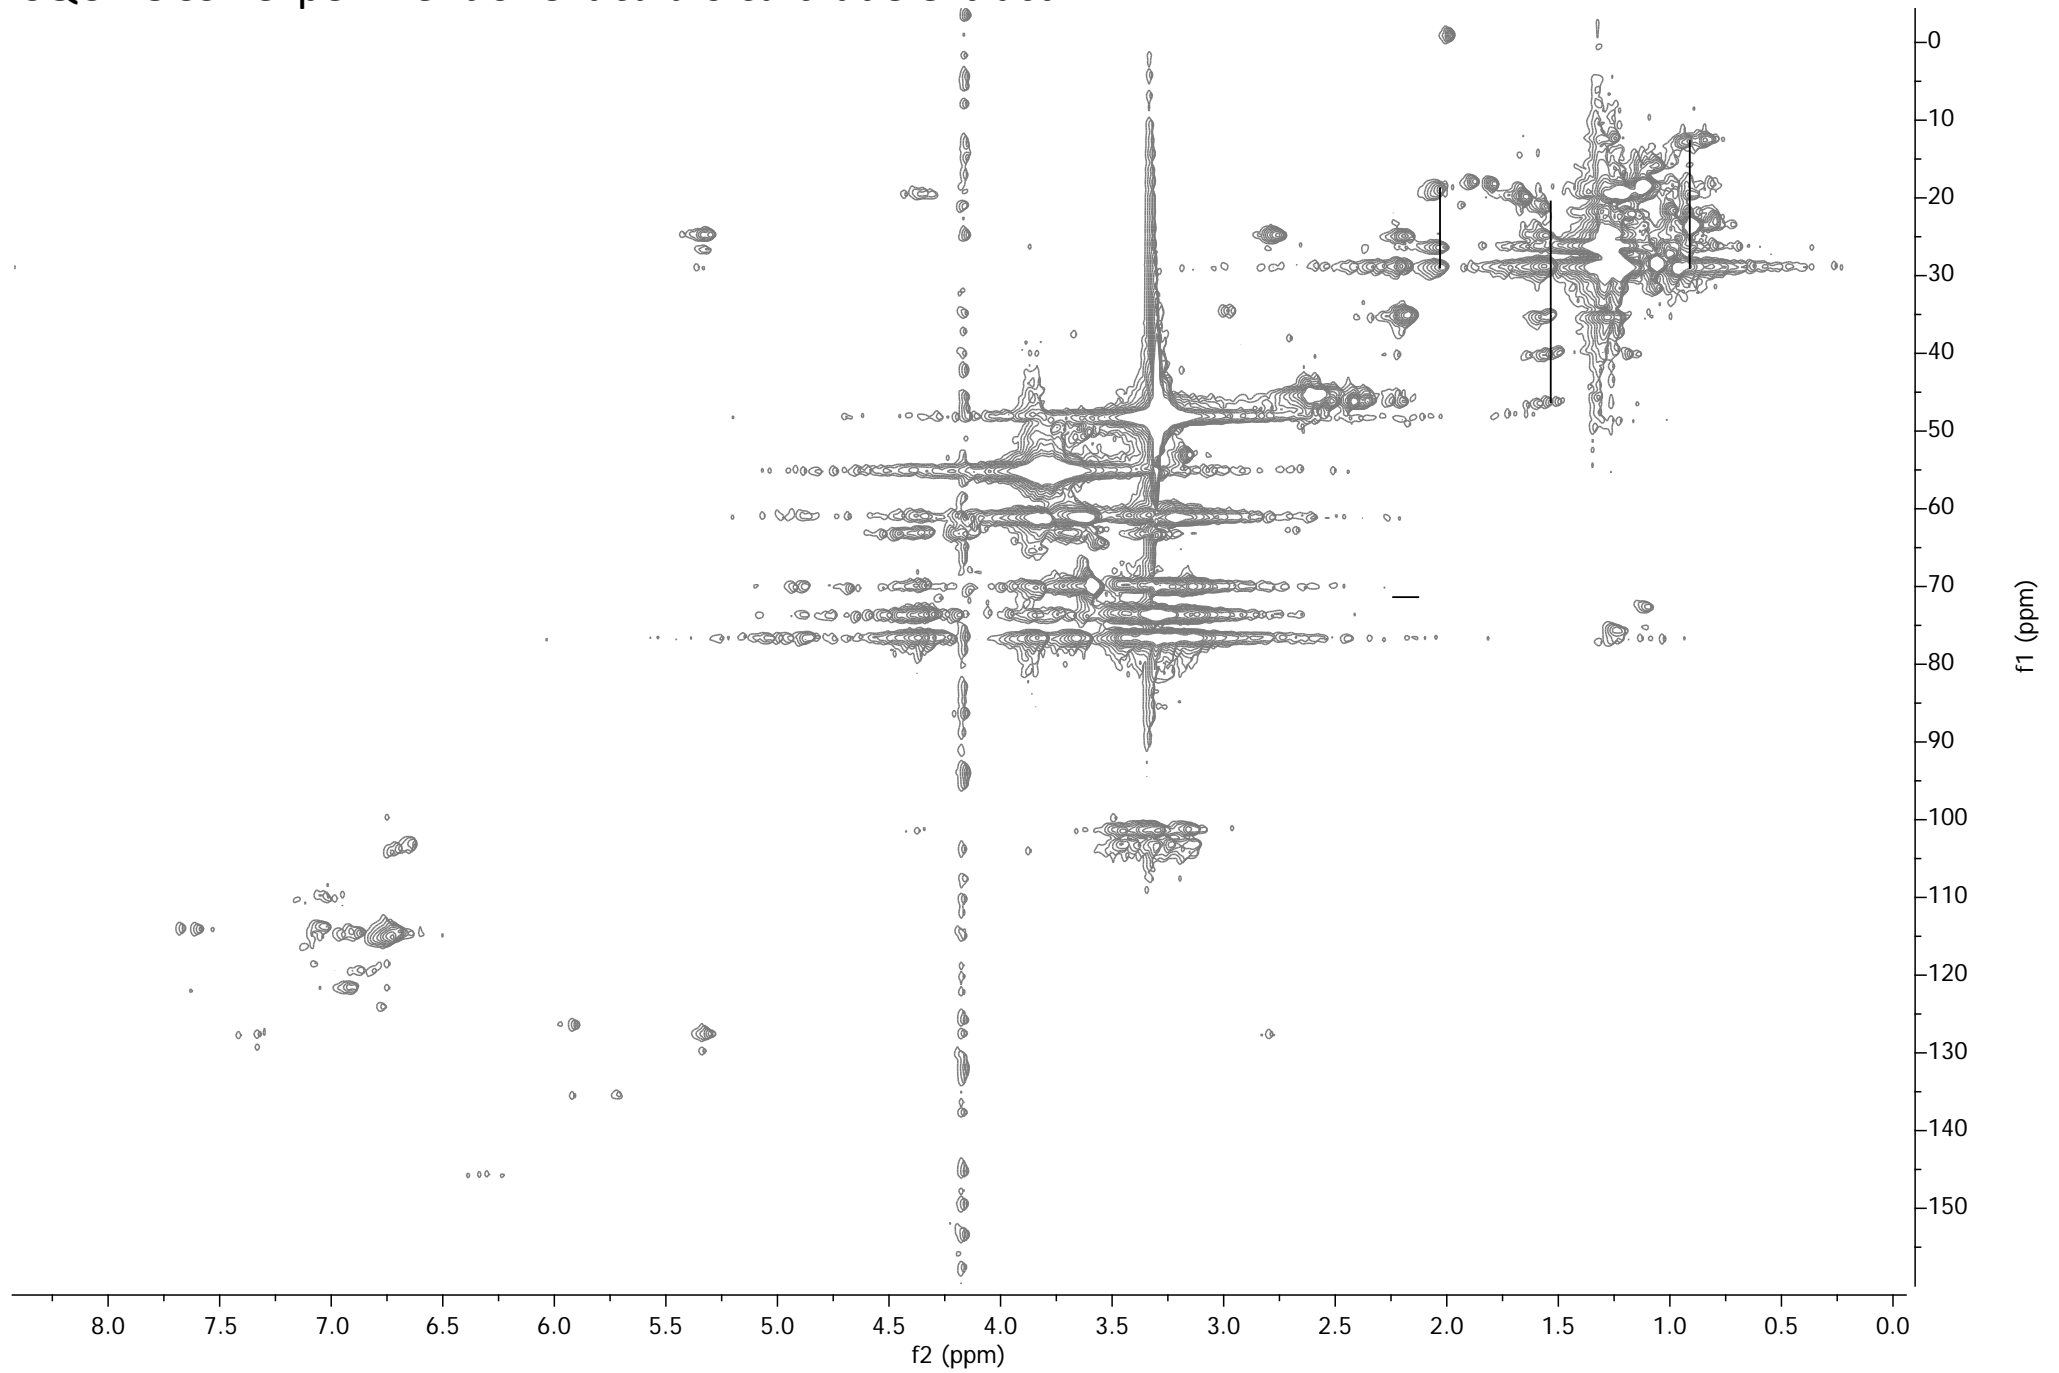

Figure S5. DQCOSY experiment of *Urtica dioica* crude extract. R= rutin. OXY=oxylipins

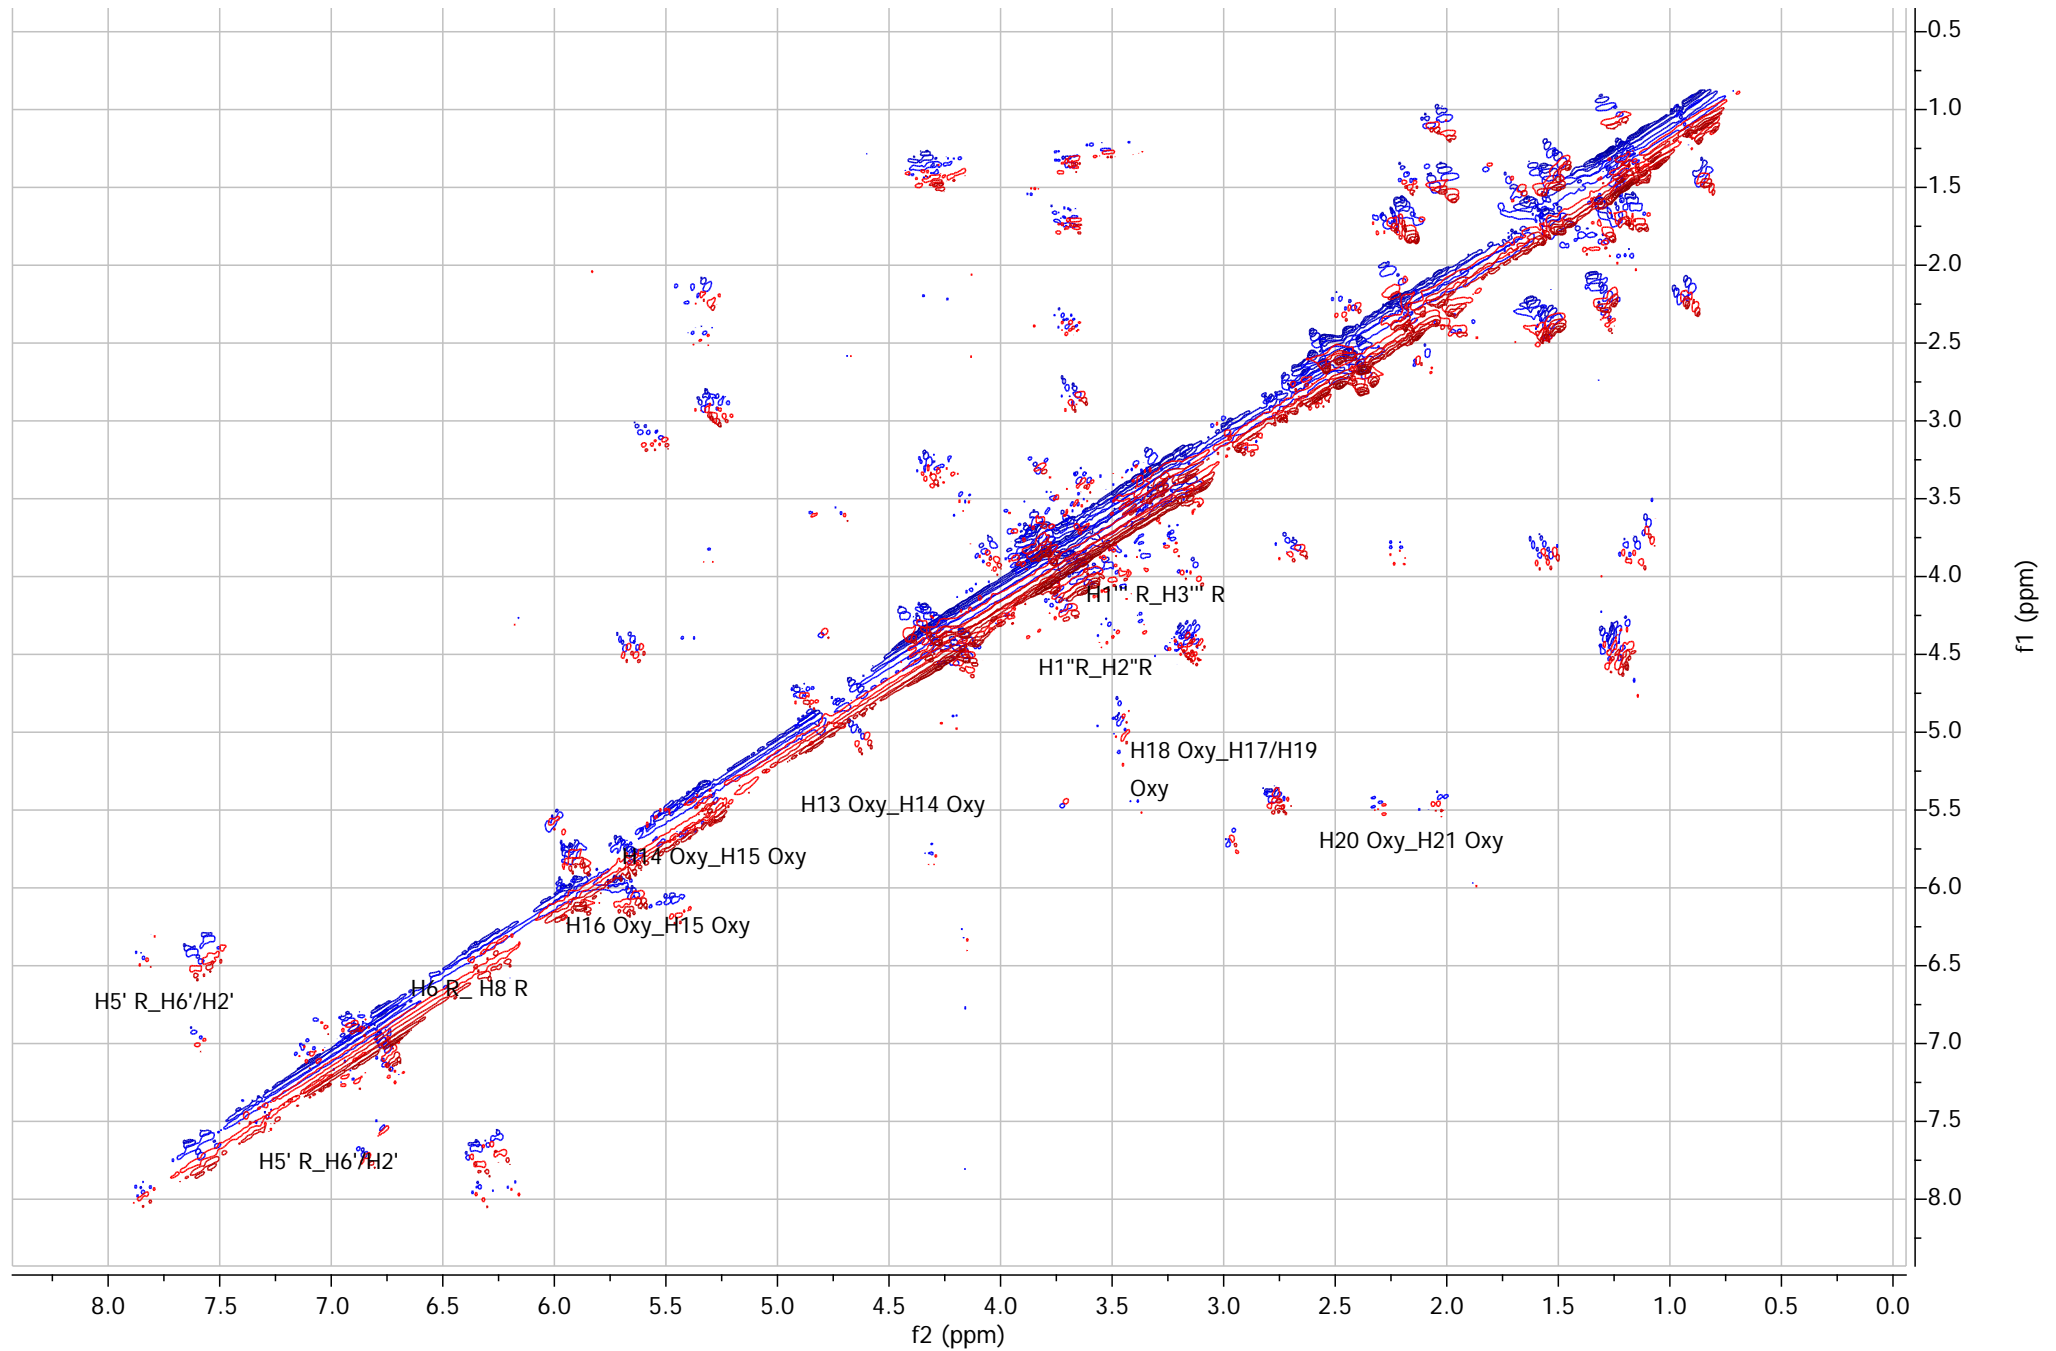



**Figure S6.** HMBC experiment of rutin

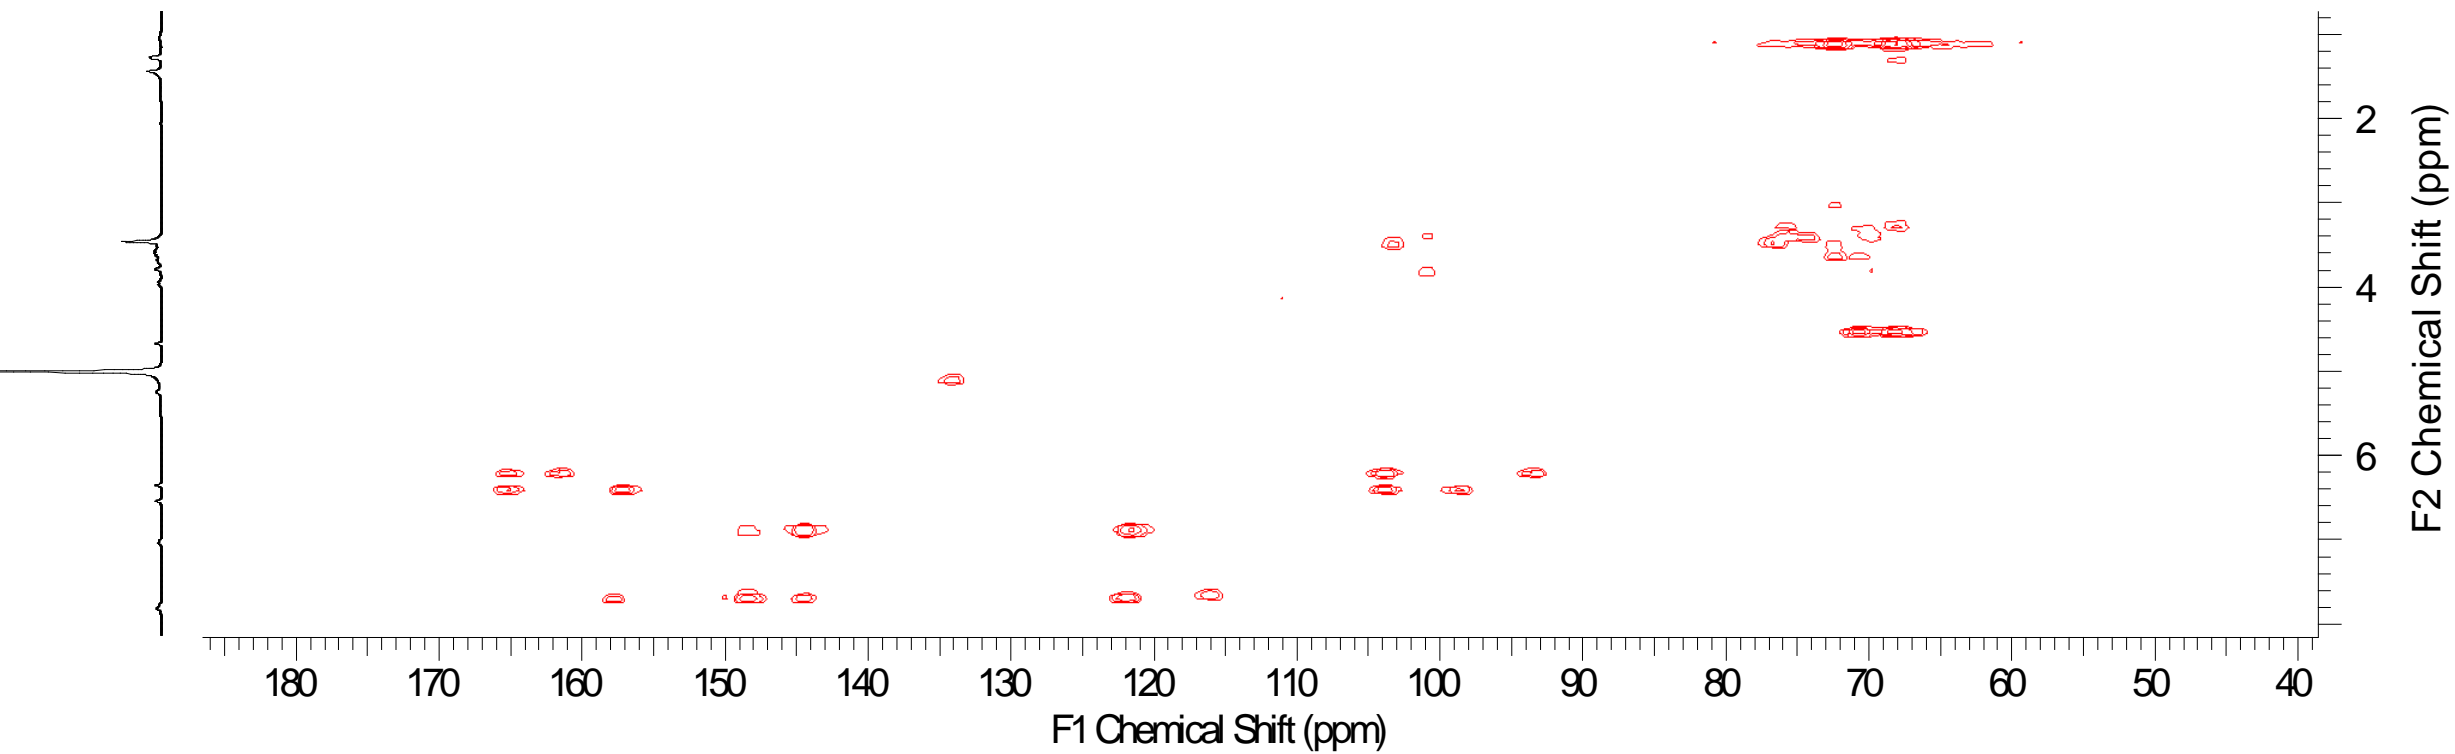

**Figure S7.**  $^1\text{H}$ -NMR spectrum of oxylipins' enriched fraction

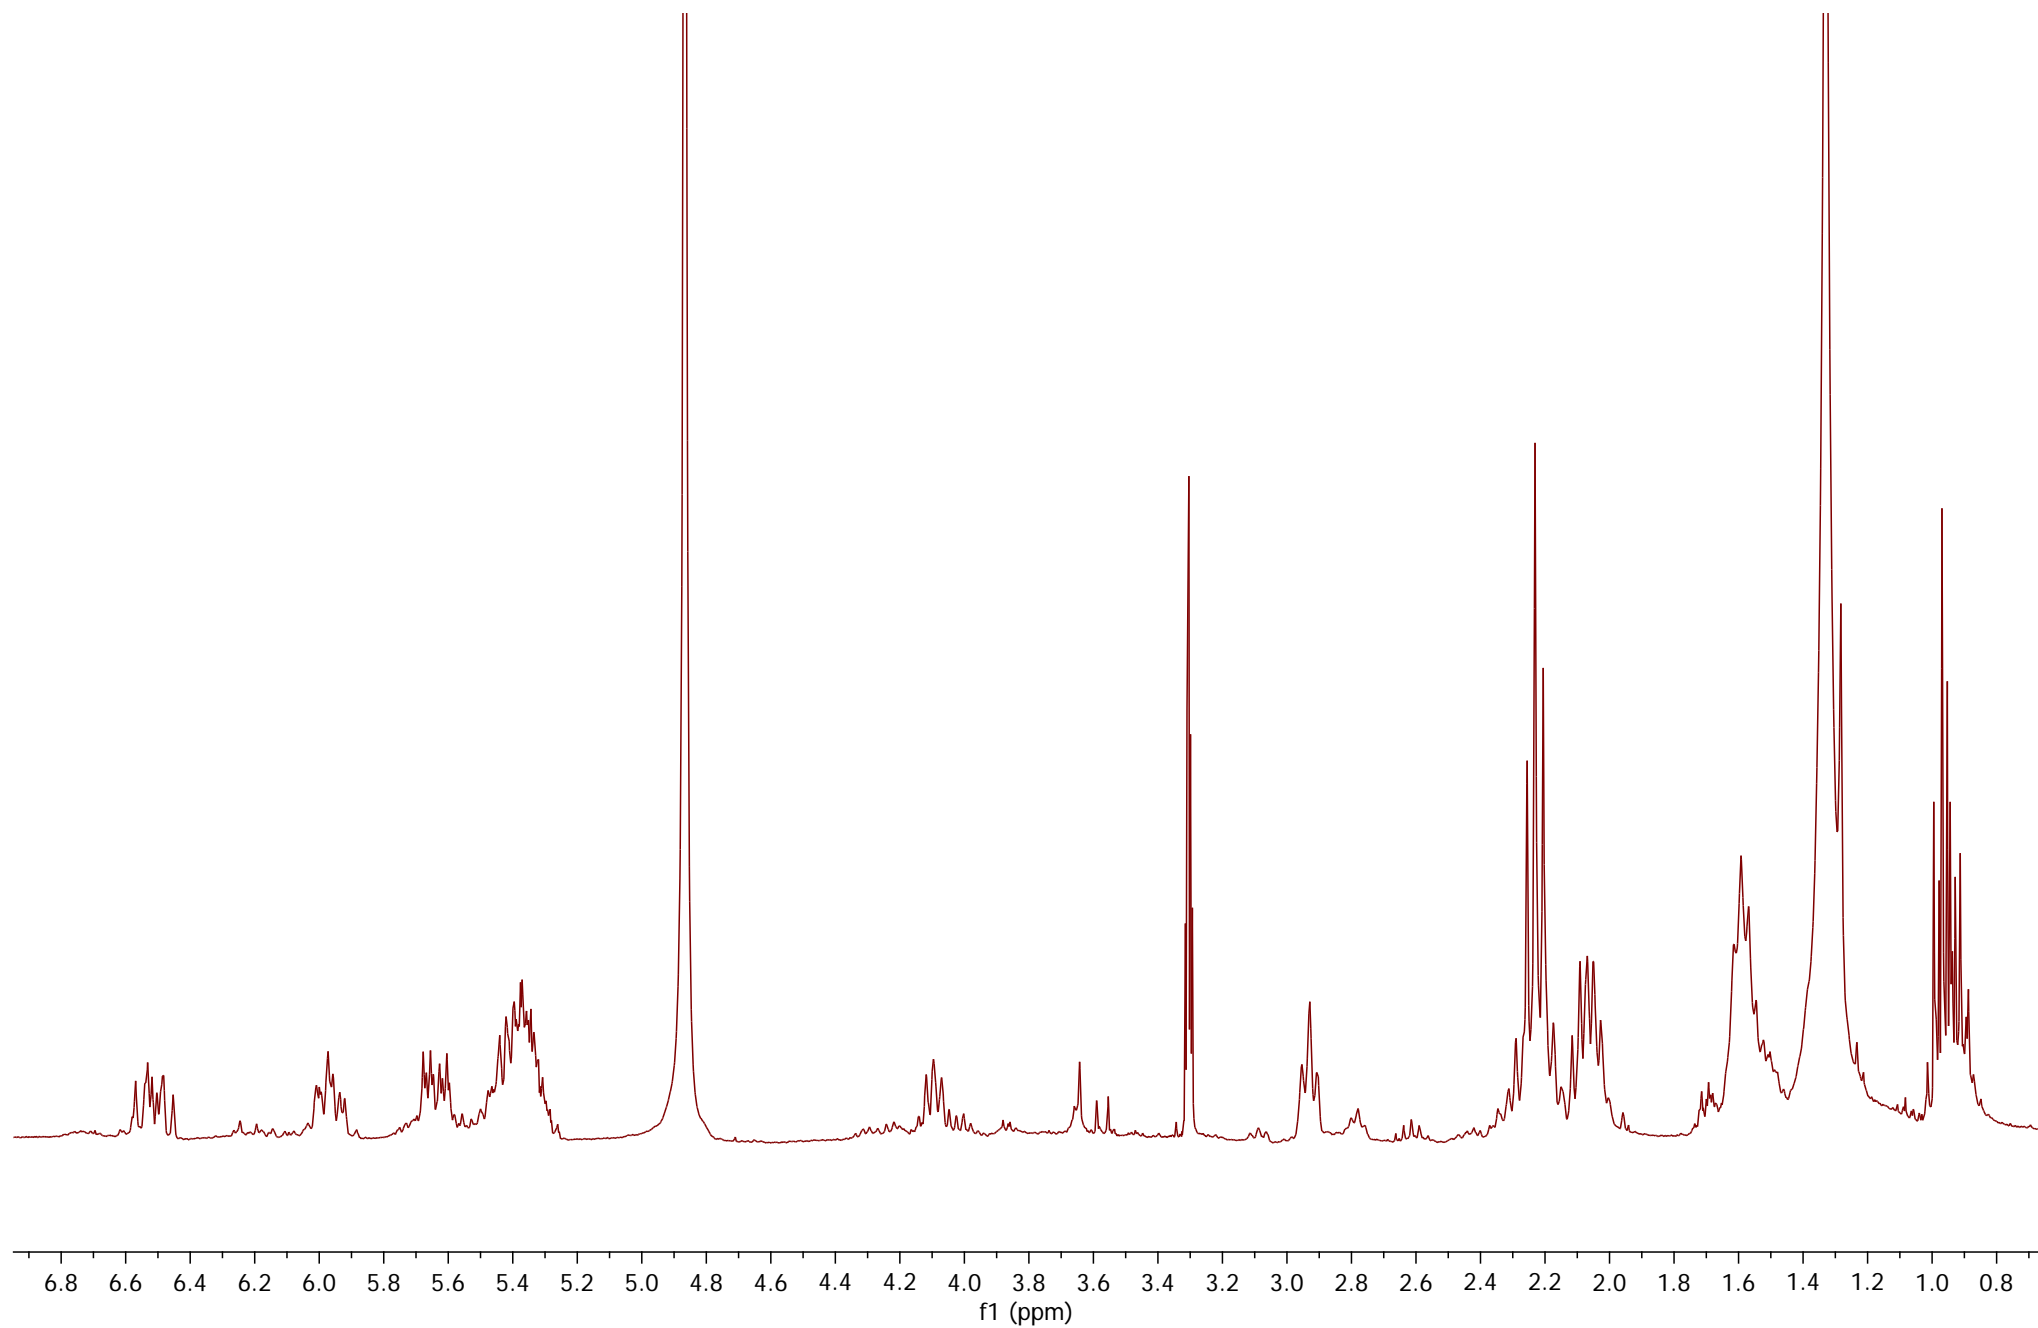

**Figure S8.** H2BC experiment of oxylipins enriched fraction

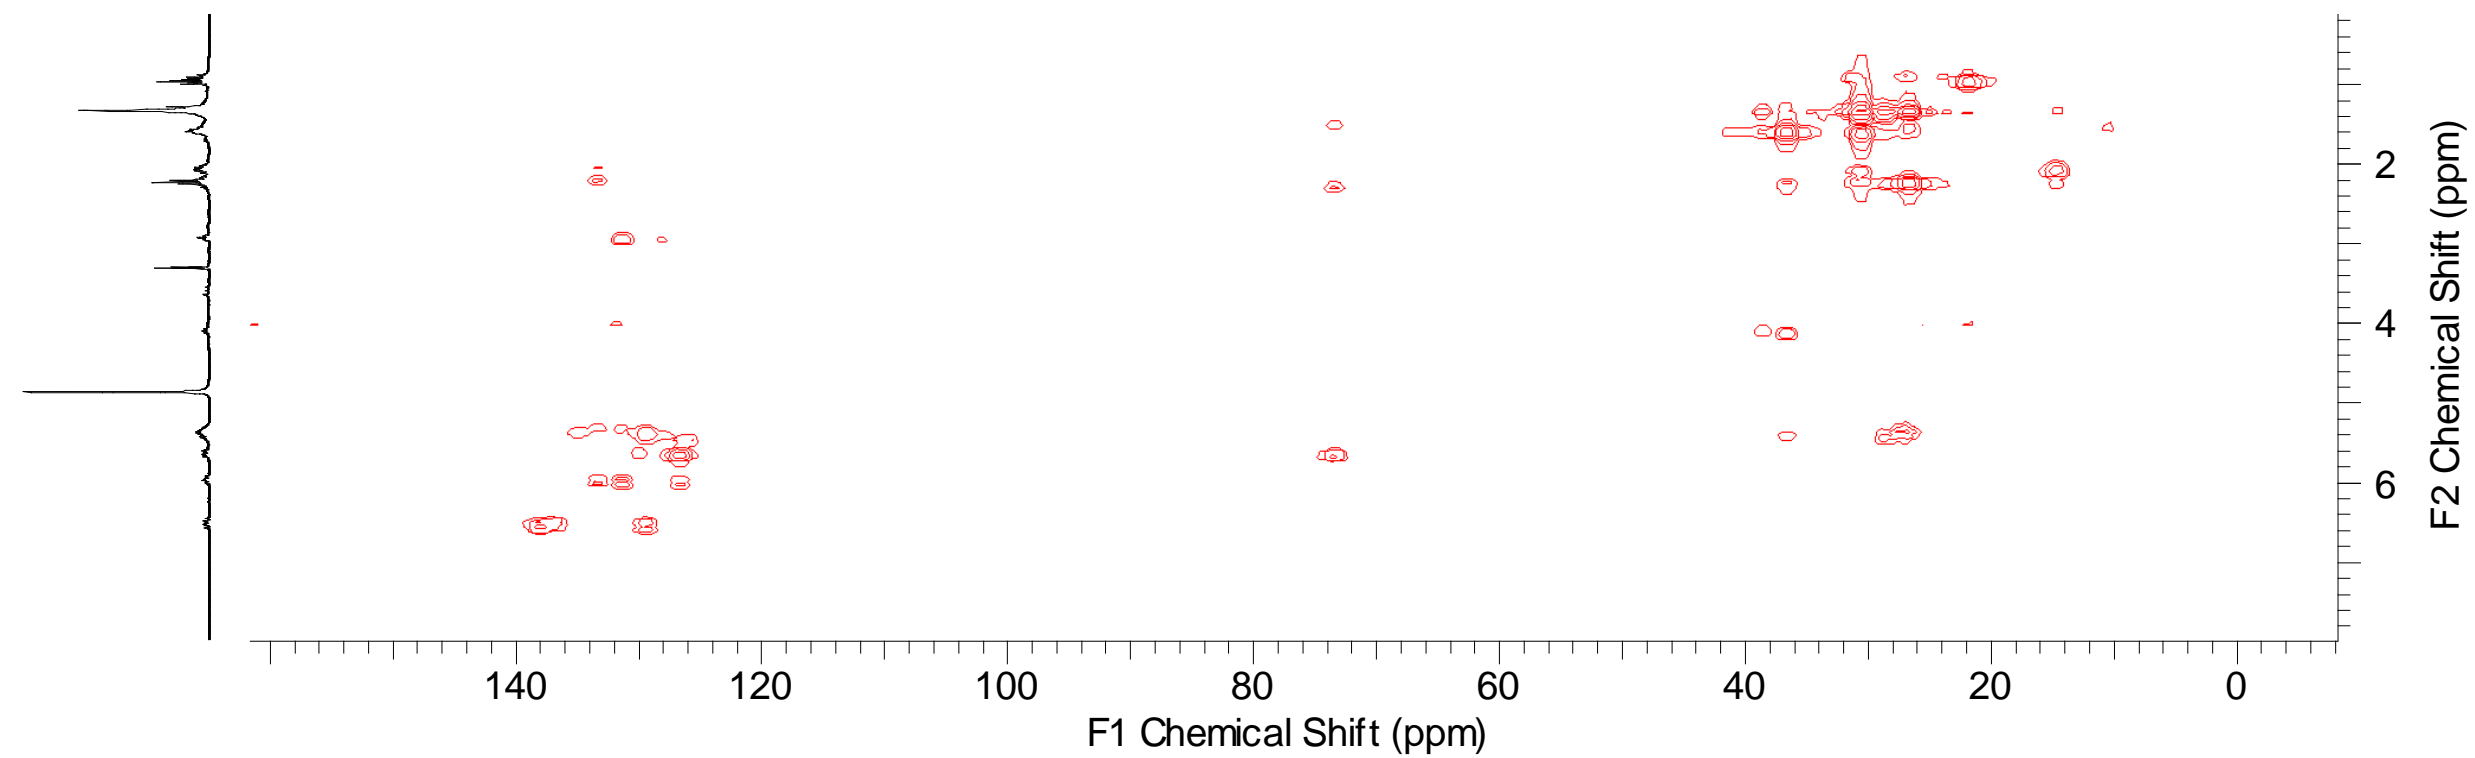

**Figure S9.** ESI Q-TOF MS SPECTRUM of main oxylipin acquired in negative (A) and positive ion mode (B)

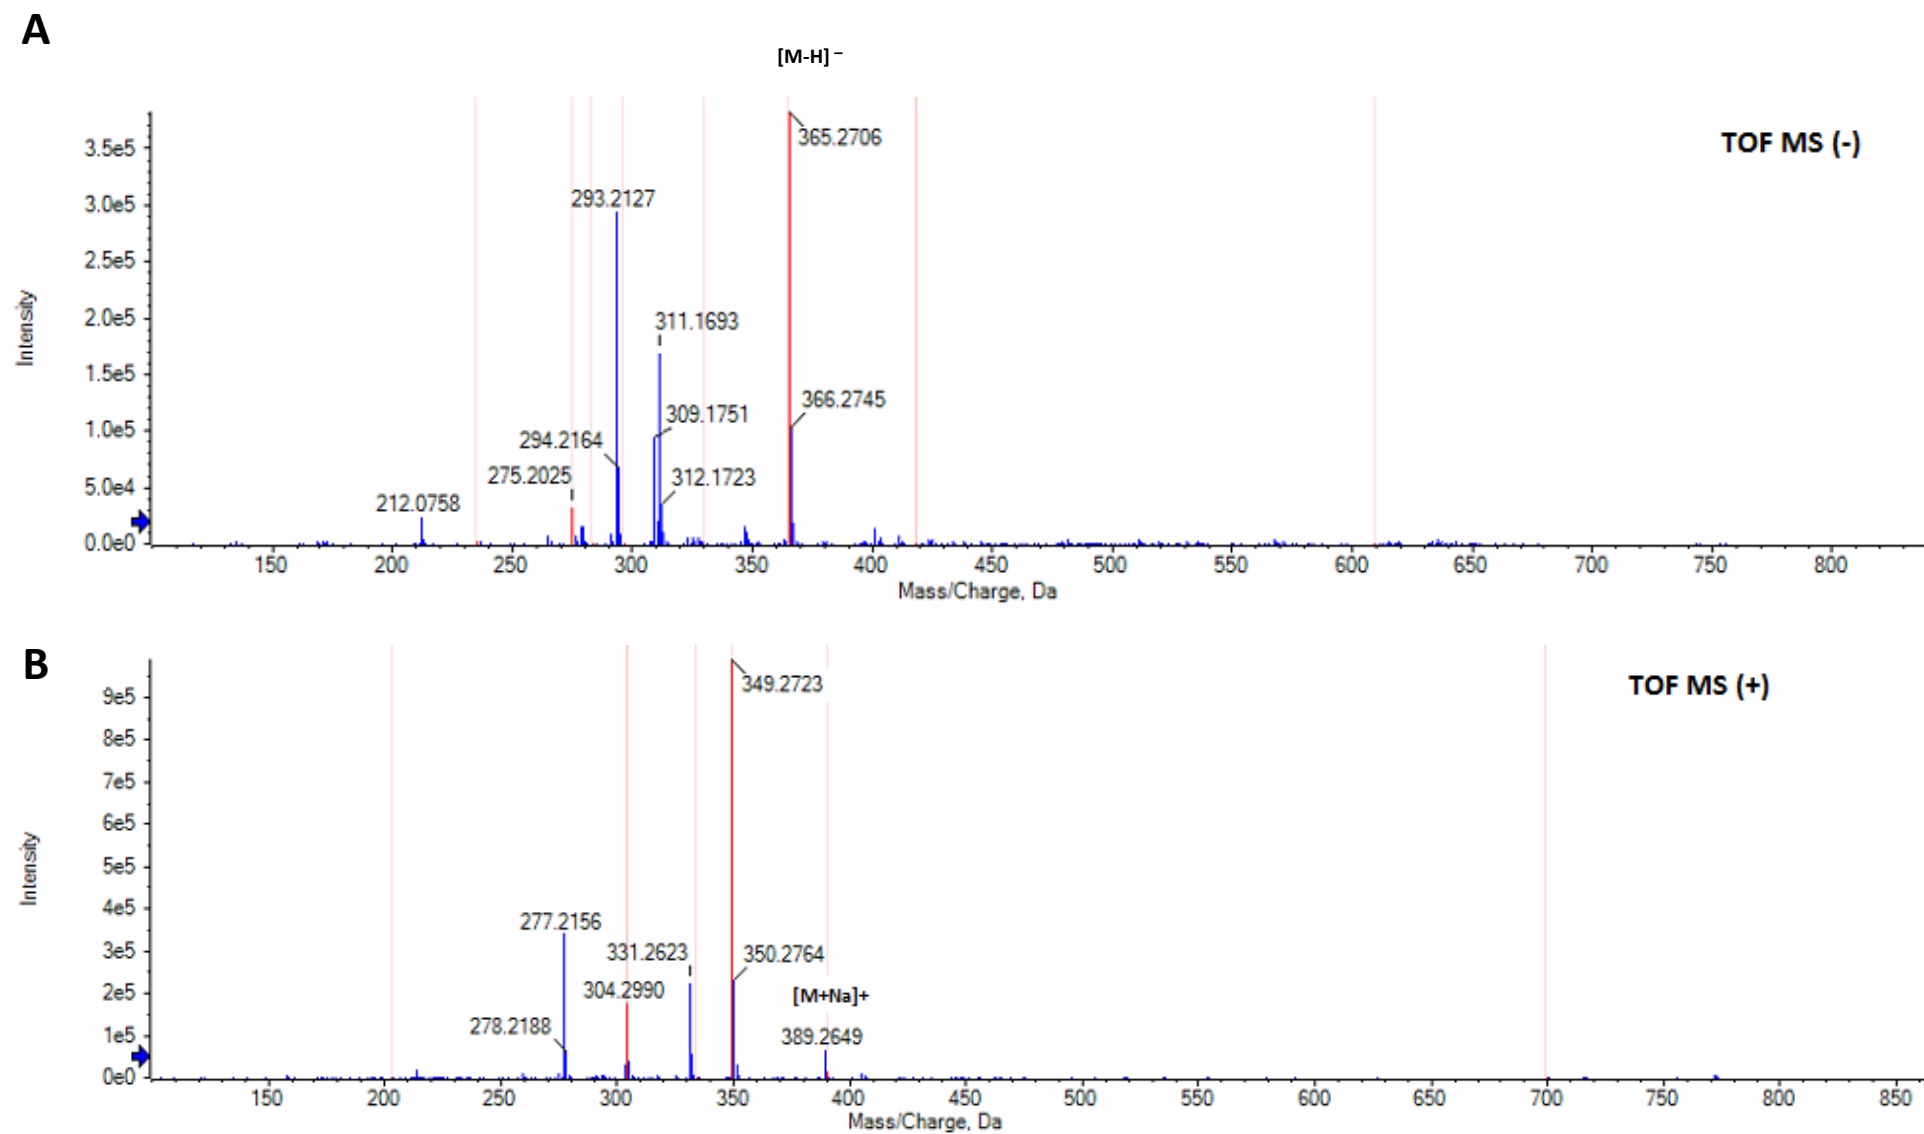

**Figure S10** HSQC experiment of the main oxylipin. A aliphatic region. B aromatic region

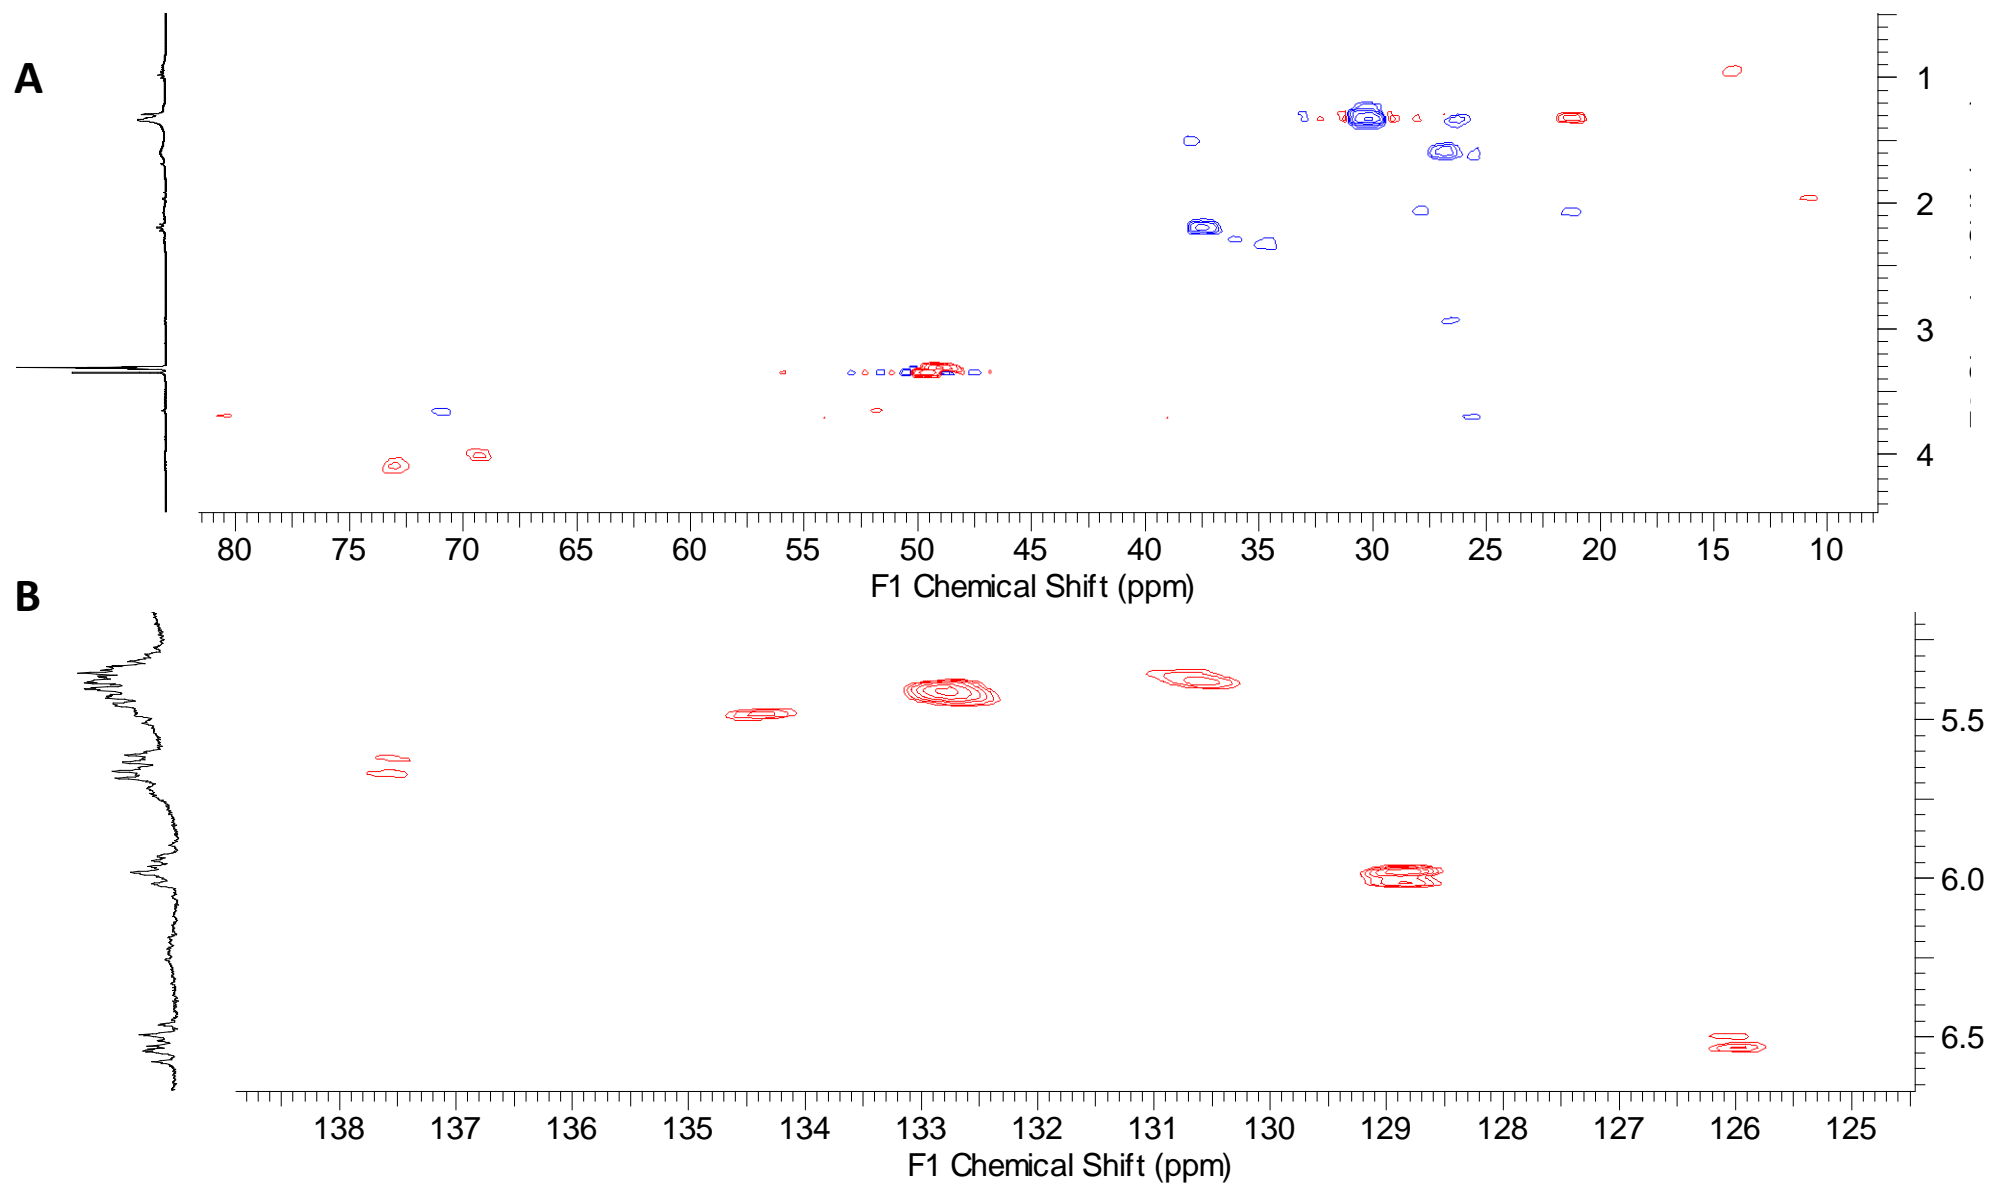

Table S1. NMR data of oxylipin recorded in CD<sub>3</sub>OD.  $\delta_{\text{H}}$  and  $\delta_{\text{C}}$  are measured in ppm

| Position | $\delta_{\text{H}}$ , m (J in Hz) | $\delta_{\text{C}}$ , (m) | HMBC (H→C)    |
|----------|-----------------------------------|---------------------------|---------------|
| 1        | -                                 | 182.4 (C)                 |               |
| 2        | 2.21 t (7.2)                      | 37.8 (CH <sub>2</sub> )   | C1            |
| 3        | 1.61 m                            | 26.8 (CH <sub>2</sub> )   | C1            |
| 4        | 1.35 ov                           | 30.6 (CH <sub>2</sub> )   | C1            |
| 5        | 1.35 ov                           | 30.5 (CH <sub>2</sub> )   |               |
| 6        | 1.35 ov                           | 30.5 (CH <sub>2</sub> )   |               |
| 7        | 1.35 ov                           | 30.6 (CH <sub>2</sub> )   |               |
| 8        | 1.61 ov                           | 26.1 (CH <sub>2</sub> )   |               |
| 9        | 1.51 sv                           | 38.4 (CH <sub>2</sub> )   |               |
| 10       | 4.00 ov                           | 69.2(CH)                  | C9, C8        |
| 11       | 2.22 ov                           | 28.3 (CH <sub>2</sub> )   |               |
| 12       | 2.27 ov                           | 36.1 (CH <sub>2</sub> )   |               |
| 13       | 4.09 ov                           | 72.9 (CH)                 | C12, C11, C10 |
| 14       | 5.66 dd (6.6, 15.0 Hz)            | 137.8 (CH)                | C13           |
| 15       | 6.53 dd (15.0 10.8 Hz)            | 126.1 (CH)                | C13, C16, C17 |
| 16       | 5.99 dt (10.8 11.1 Hz)            | 128.8 (CH)                | C14, C15      |
| 17       | 5.35 ov                           | 131.5 (CH)                |               |
| 18       | 2.95 t (7.2)                      | 26.6 (CH <sub>2</sub> )   | C17, C19, C20 |
| 19       | 5.38 ov                           | 130.8 (CH)                |               |
| 20       | 5.43 ov                           | 132.7 (CH)                |               |
| 21       | 2.07 m                            | 21.4 (CH <sub>2</sub> )   |               |
| 22       | 0.99 t (7.5)                      | 14.2 (CH <sub>3</sub> )   | C20, C21      |

*dd*=doublet of doublet, *m*=multiplet, *ov*=overlapped, *t*=triplet.
